# Supplementary material for: Life of superoxide in aprotic Li–O2 battery electrolytes: simulated solvent and counter-ion effects
Source: Royal Society of Chemistry journal article supplement (doi:10.1039/c5cp08056h), 2016-01-01
Supplement: c5cp08056h1.pdf [file c5cp08056h1.pdf]

### Supplementary information:

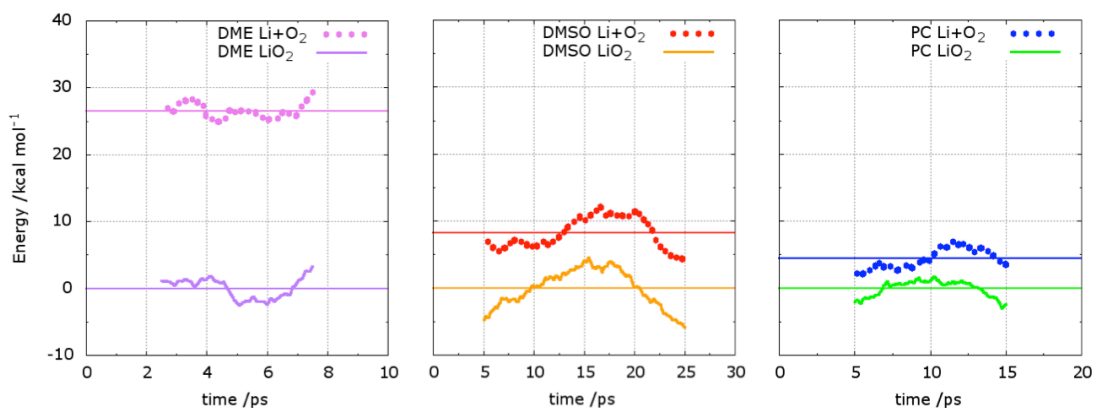

**Figure S1** Energy trajectories from DFT-MD simulations of DME (total 10 ps, running average 5 ps), DMSO (total 30 ps, running average 10 ps), and PC electrolytes (total 20 ps, running average 10 ps).

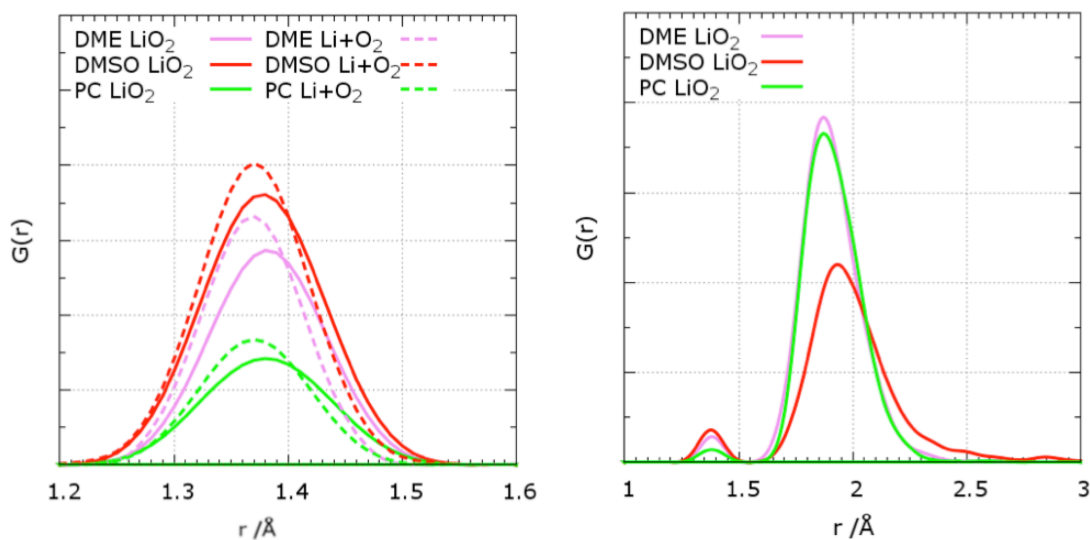

**Figure S2** Radial distribution function of DME, DMSO, and PC electrolytes from DFT-MD simulations, T=353K, t=10 ps.

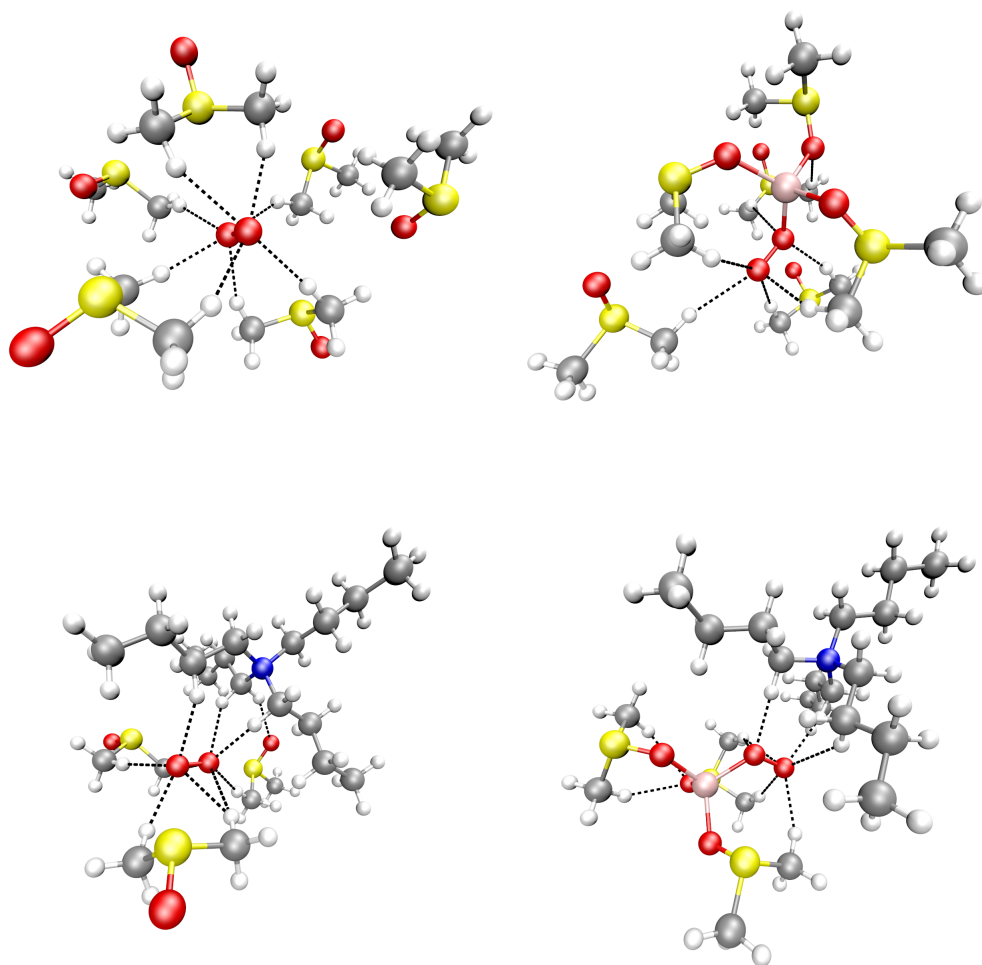

**Figure S5** Cluster models of O<sub>2</sub><sup>\*-</sup> and LiO<sub>2</sub><sup>\*</sup> with six explicit DMSO molecules each, and [TBA]<sup>+</sup>[O<sub>2</sub><sup>\*-</sup>] and [TBA]<sup>+</sup>[LiO<sub>2</sub><sup>\*</sup>] with three DMSO. All structures were optimized also in the presence of a continuum DMSO solvent model (PCM).

**Table S1** rOO and rOLi bond distances in solvent-ion clusters. B3LYP/6-31G(d).

| Solvent                 | Original clusters |       | Ionized clusters (IP) |       | Reduced clusters (EA) |       |
|-------------------------|-------------------|-------|-----------------------|-------|-----------------------|-------|
|                         | rOO               | rOLi  | rOO                   | rOLi  | rOO                   | rOLi  |
| DME <sub>O2</sub>       | 1.344             | –     | 1.215                 | –     | 1.527                 | –     |
| DME <sub>LiO2</sub>     | 1.348             | 1.923 | 1.215                 | 3.234 | 1.532                 | 1.796 |
| DME <sub>TBAO2</sub>    | 1.342             | –     | 1.215                 | –     | 1.515                 | –     |
| DME <sub>TBAO2Li</sub>  | 1.347             | 1.939 | 1.215                 | 3.227 | 1.530                 | 1.804 |
| DMSO <sub>O2</sub>      | 1.342             | –     | 1.215                 | –     | 1.505                 | –     |
| DMSO <sub>LiO2</sub>    | 1.343             | 1.980 | 1.214                 | 3.288 | 1.505                 | 1.887 |
| DMSO <sub>TBAO2</sub>   | 1.342             | –     | 1.215                 | –     | 1.510                 | –     |
| DMSO <sub>TBAO2Li</sub> | 1.341             | 1.974 | 1.215                 | 3.230 | 1.502                 | 1.849 |
| DMSO <sub>O2</sub>      | 1.342             | –     | 1.215                 | –     | 1.505                 | –     |
| PC <sub>O2</sub>        | 1.343             | –     | 1.215                 | –     | 1.496                 | –     |
| PC <sub>LiO2</sub>      | 1.348             | 1.915 | 1.21X                 | 3.25X | 1.532                 | 1.808 |
| PC <sub>TBAO2</sub>     | 1.343             | –     | 1.214                 | –     | 1.521                 | –     |
| PC <sub>TBAO2Li</sub>   | 1.347             | 1.909 | 1.220                 | 3.520 | 1.538                 | 1.788 |

**Table S2** Functional dependence of the rOO bond distances. The B3LYP and PBEPBE functionals, together with the 6-31G(d) basis set, have been used to calculate rOO of a single O<sub>2</sub><sup>\*-</sup> molecule in different continuum solvents using Gaussian.

|                                     | B3LYP        | PBEPBE       | DFT-MD (PBE) |
|-------------------------------------|--------------|--------------|--------------|
| rOO (O <sub>2</sub> <sup>*-</sup> ) | 1.353 (VAC)  | 1.368 (VAC)  | –            |
|                                     | 1.350 (DEE)  | 1.364 (DEE)  | –            |
|                                     | 1.350 (DME)  | 1.364 (DME)  | 1.369 (DME)  |
|                                     | 1.349 (DMSO) | 1.364 (DMSO) | 1.370 (DMSO) |
|                                     | 1.349 (PC)   | 1.364 (PC)   | 1.372 (PC)   |

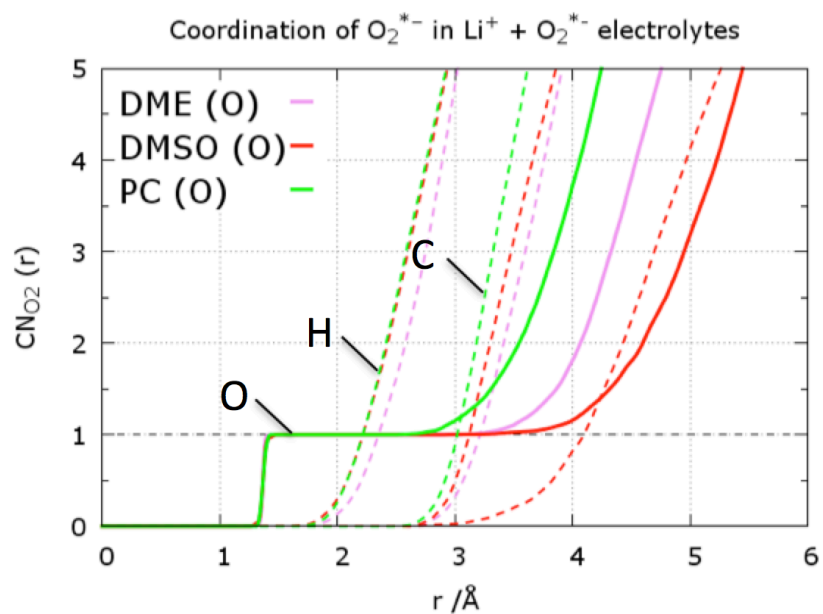

**Figure S4** The average coordination number of the oxygen atoms of  $O_2^{*-}$  in DME, DMSO, and PC SSIP electrolytes.

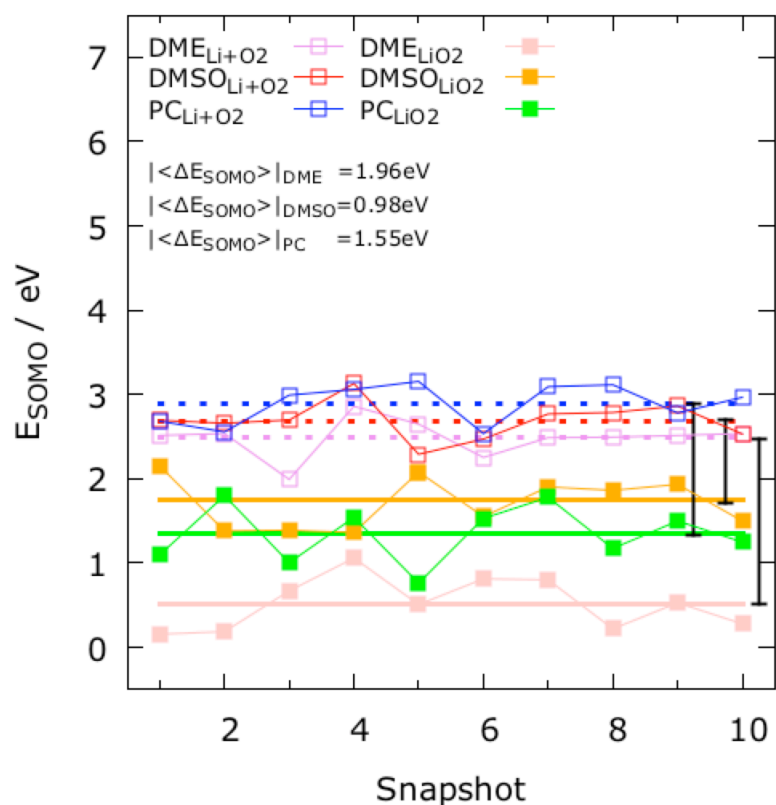

**Figure S5** Calculated SOMO levels in DME, DMSO, and PC CIP and SSIP based on 10 snapshots from DFT-MD simulations.

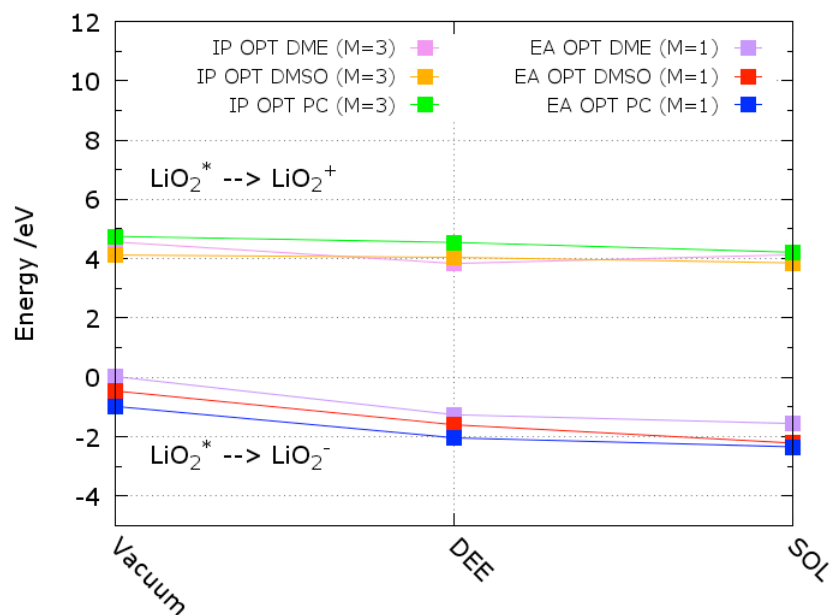

**Figure S6** Ionization potentials (IP) and Electron affinities (EA) of  $\text{LiO}_2^*$  explicitly solvated by six DME, DMSO, or PC molecules and an additional PCM continuum (vacuum, DEE, or SOL=DME, DMSO, or PC). All data are based on optimized energies of the oxidation/reduction products. B3LYP/6-31G(d).

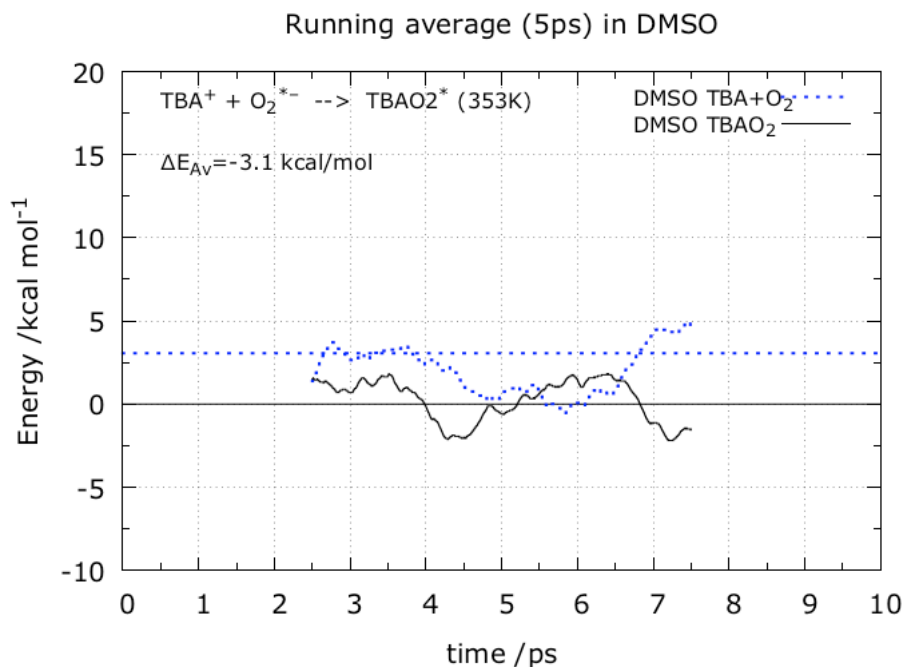

**Figure S7** Running averages (5 ps) and total energy averages (10 ps) of  $\text{TBAO}_2^*$  (solid) or  $\text{TBA}^+ + \text{O}_2^{*-}$  (dotted) trajectories from DFT-MD simulations of DMSO. CIP formation is slightly exothermic. Absolute energies have been shifted to ease comparison.  $T=353\text{K}$ ,  $t=10\text{ ps}$ .

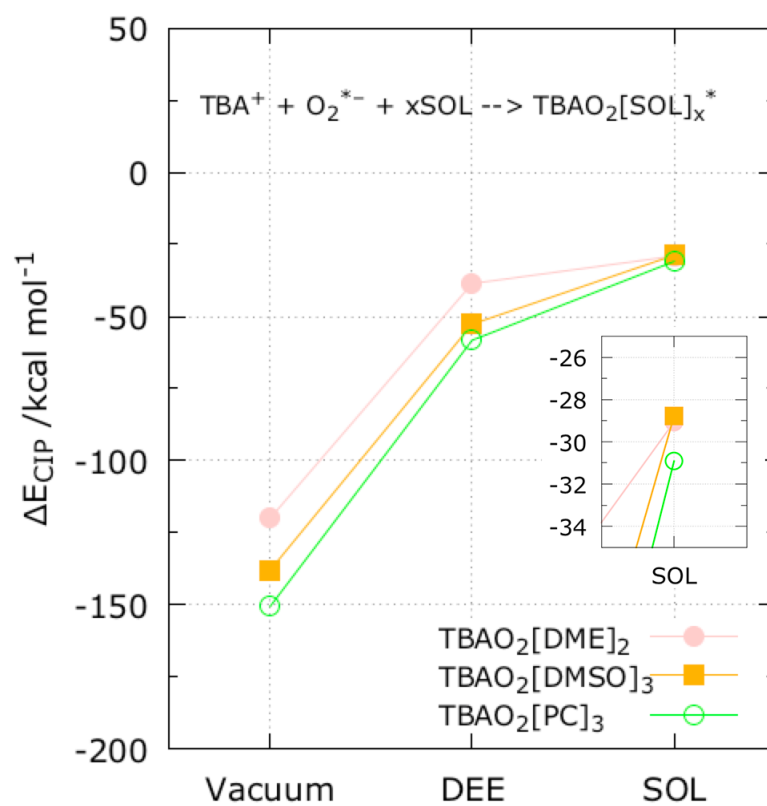

**Figure S8** Formation energy of TBAO<sub>2</sub>\* CIP explicitly solvated by two or three molecules of DME, DMSO, or PC, as a function of additional implicit PCM solvation. B3LYP/6-31G(d).

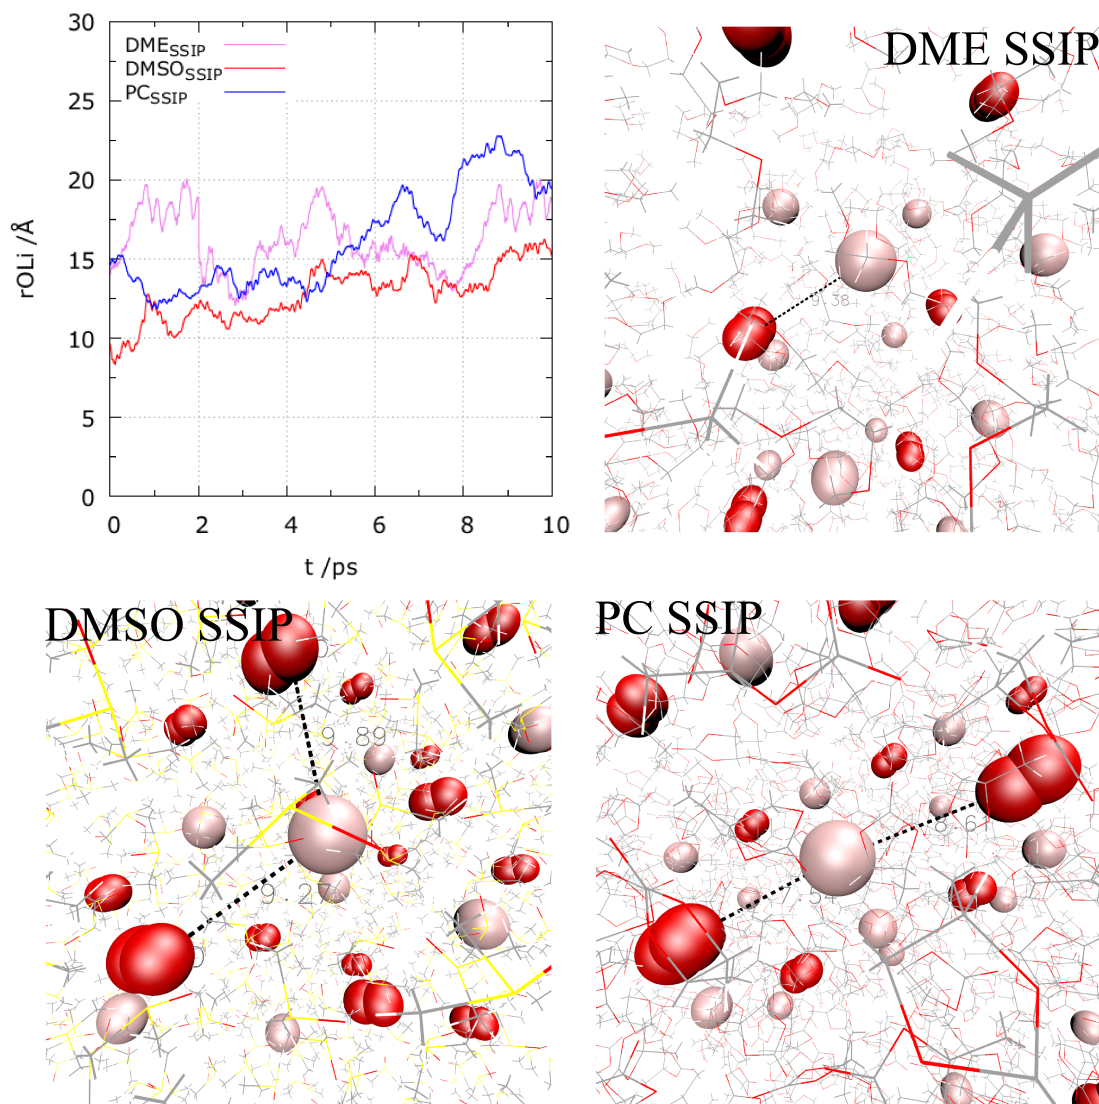

**Figure S9** rOLi distance during 10ps of DFT-MD simulations of solvent-separated ion pairs (SSIP) and highlights of the final ion distributions including the nearest periodic image of each box. The final rOLi distances in each box are: 9.38Å (DME), 9.27Å (DMSO), and 7.54Å (PC). CPMD; T=350K.
